# Supplementary material for: California Niño/Niña
Source: PubMed Central journal article supplement (PMC3999445; doi:10.1038/srep04801), 2014-04-25
Supplement: srep04801-s1.pdf [file srep04801-s1.pdf]

## Supplementary Information

Chaoxia Yuan\* and Toshio Yamagata

Application Laboratory, Japan Agency for Marine-Earth Science and Technology,

Yokohama 236-0001, Japan

The data used for the supplementary figures include NCEP/NCAR reanalysis 1, ERA-Int<sup>36</sup>, OISST, Global Precipitation Climatology Project monthly precipitation (GPCP)<sup>37</sup> and NCEP Global Ocean Data Assimilation System (GODAS)<sup>38</sup> from January 1982 to December 2011. Objectively Analyzed air-sea heat Fluxes for the Global Oceans (OAFlux)<sup>39</sup> and International Satellite Cloud Climatology Project (ISCCP)<sup>40</sup> from July 1983 to December 2009 are also used. Three-month-running mean anomalies are adopted to represent the monthly anomalies during the linear correlation, regression and composite analyses to minimize the intra-seasonal variations in Supplementary Figs. 3-6, 8-10.

36. Dee, D. P. et al. The ERA-interim reanalysis: configuration and performance of the data assimilation system. *Q. J. R. Meteorol Soc*, **137**, 553-597 (2011)

37. Adler, R. F. et al. The version 2 global precipitation climatology projection (GPCP) monthly precipitation analysis (1979-Present). *J. Hydrometeor.*, **4**, 1147-1167 (2003)

38. Behringer, D. & Xue, Y. Evaluation of the global ocean data assimilation system at NCEP: The Pacific Ocean. Preprints, Eighth Symp. On Integrated Observing and Assimilation System for Atmosphere, Ocean, and Land Surface, Seattle, WA, *Amer. Meteor.*

24 *Soc.* (2004)

25 39. Yu, L. & Weller, R. A. Objectively Analyzed air-sea heat Fluxes (OAFlux) for the global  
26 oceans. *Bull. Ameri. Meteor. Soc.* **88**, 527-539 (2007)

27 40. Rossow, W. B. & Schiffer R. A. Advances in understanding clouds from ISCCP. *Bull.*  
28 *Amer. Met. Soc.* **80**, 2261-2287 (1999)

29

30

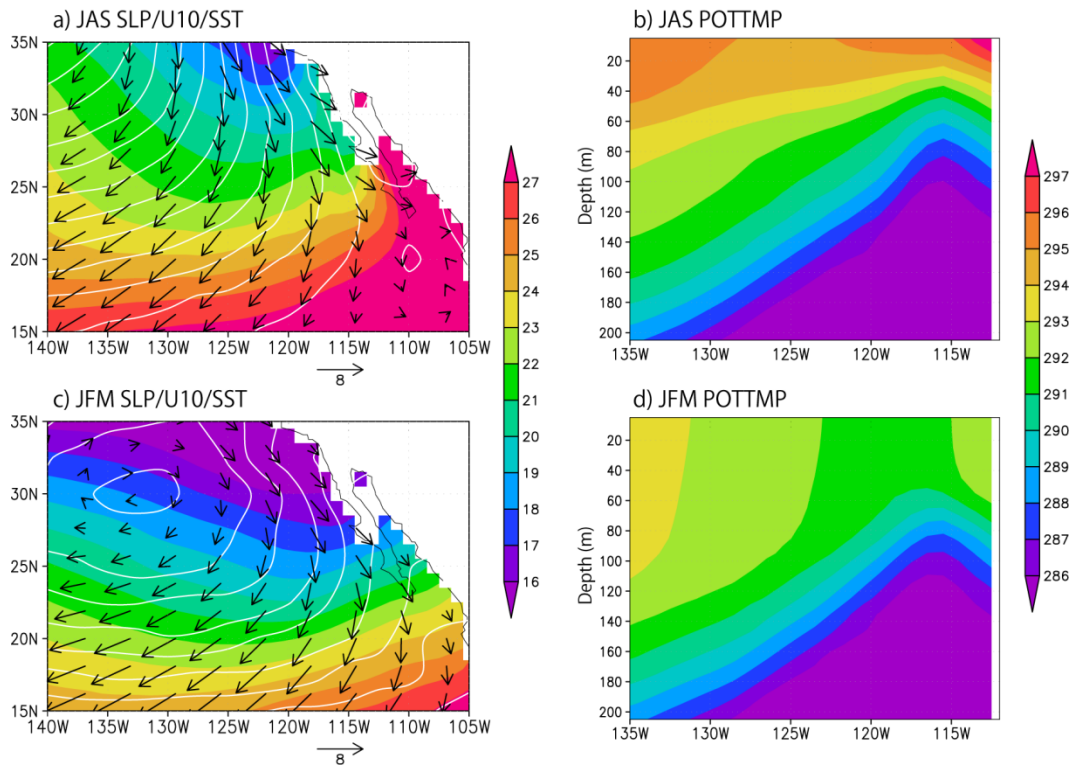

31

32 **Supplementary Figure 1:** Long-term mean (a, c) SLP (contour, hPa), 10-meter-height wind  
33 (vector,  $\text{m s}^{-1}$ ) and SST (shading,  $^{\circ}\text{C}$ ) and (b, d) vertical-zonal sections of potential  
34 temperature (shading, K) in the upper ocean at  $25^{\circ}\text{N}$  in (a, b) July-September (JAS) and (c, d)  
35 January-March. The figure was plotted by Grads software.

36

37

38

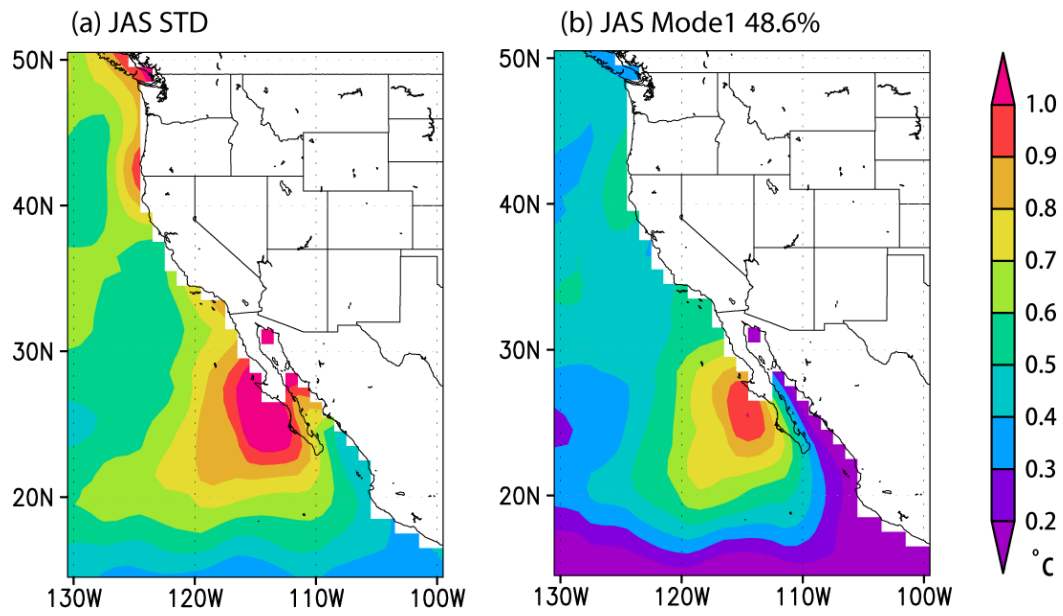

39

40 **Supplementary Figure 2:** (a) Standard deviation and (b) the first EOF mode of the JAS SST

41 anomalies from 1982 to 2011. The explained variance by the first EOF mode is 48.56%. The

42 figure was plotted by GrADs software.

43

44

45

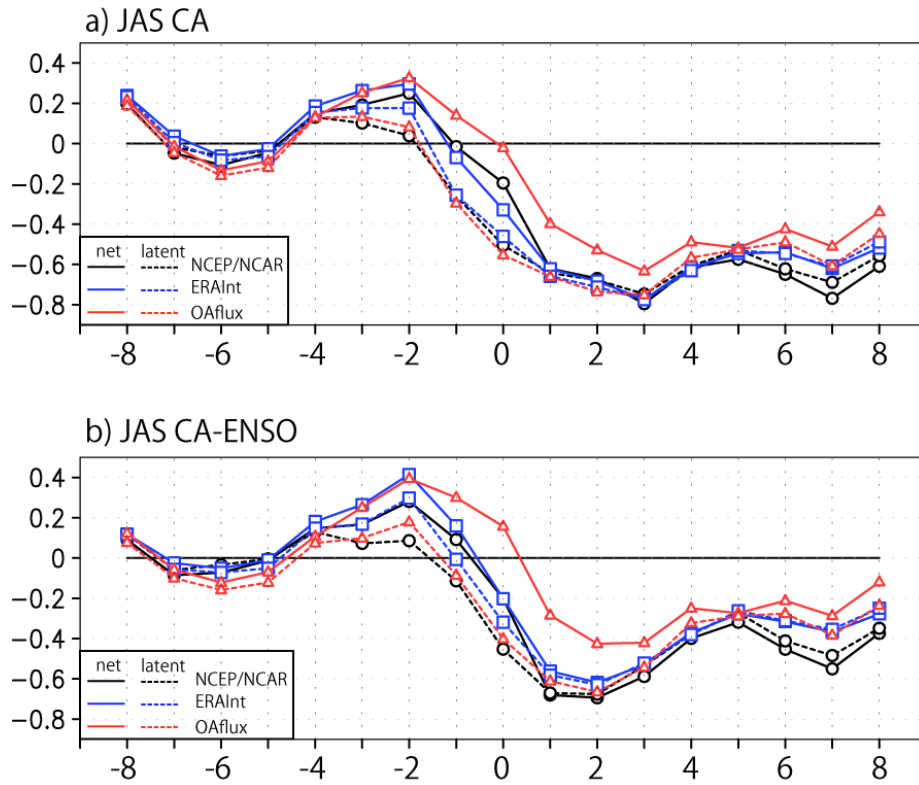

46

47 **Supplementary Figure 3:** (a) Lead-lag correlation coefficients between JAS California  
 48 Niño/Niña indices and the 3-month-running mean net surface (solid line) and latent (dashed  
 49 line) heat fluxes averaged over the enclosed coastal ocean in Fig. 1a based on NCEP/NCAR  
 50 (dark line), ERA-Int (blue line) and OAflux (red line). Negative (positive) numbers in the  
 51 x-axis denote the months that JAS California Niño/Niña indices lag (lead). (b) as in (a)  
 52 except that the correlation coefficients are calculated by the JAS California Niño/Niña  
 53 indices after linearly regressing out the simultaneous variations related to ENSO. Correlation  
 54 coefficients of  $\sim 0.4$  are significant at the 95% confidence level by the two-tailed  $t$  test. The  
 55 figure was plotted by GrADs software.

56

57

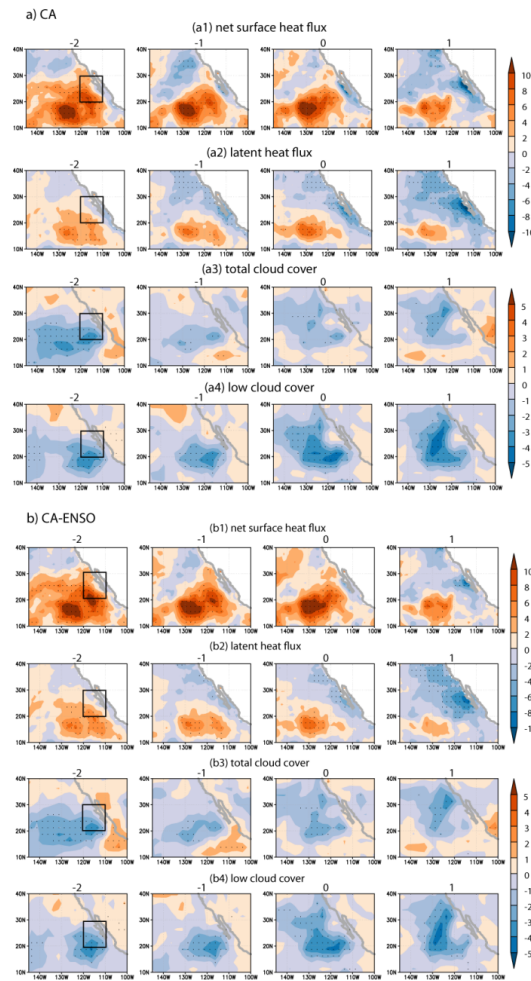

58

59 **Supplementary Figure 4:** (a) Lead-lag linear regression of 3-month-running mean  
60 anomalies in (a1) net surface and (a2) latent heat fluxes ( $\text{W m}^{-2}$ , positive downward), and (a3)  
61 total and (a4) low cloud cover percentage based on the JAS California Niño/Niña indices.  
62 Negative (positive) numbers on the top of each panel denote the months that the JAS  
63 California Niño/Niña indices lag (lead). The dark frames in the first column denote the  
64 coastal ocean of interest. (b) as in (a) except that the regression is computed based on the JAS  
65 California Niño/Niña indices after linearly regressing out the simultaneous variations related  
66 to ENSO. Anomalies significant at the 95% confidence level by the two-tailed  $t$  test are  
67 stippled. OAFflux and ISCCP data are used here. The figure was plotted by GrADs software.

68

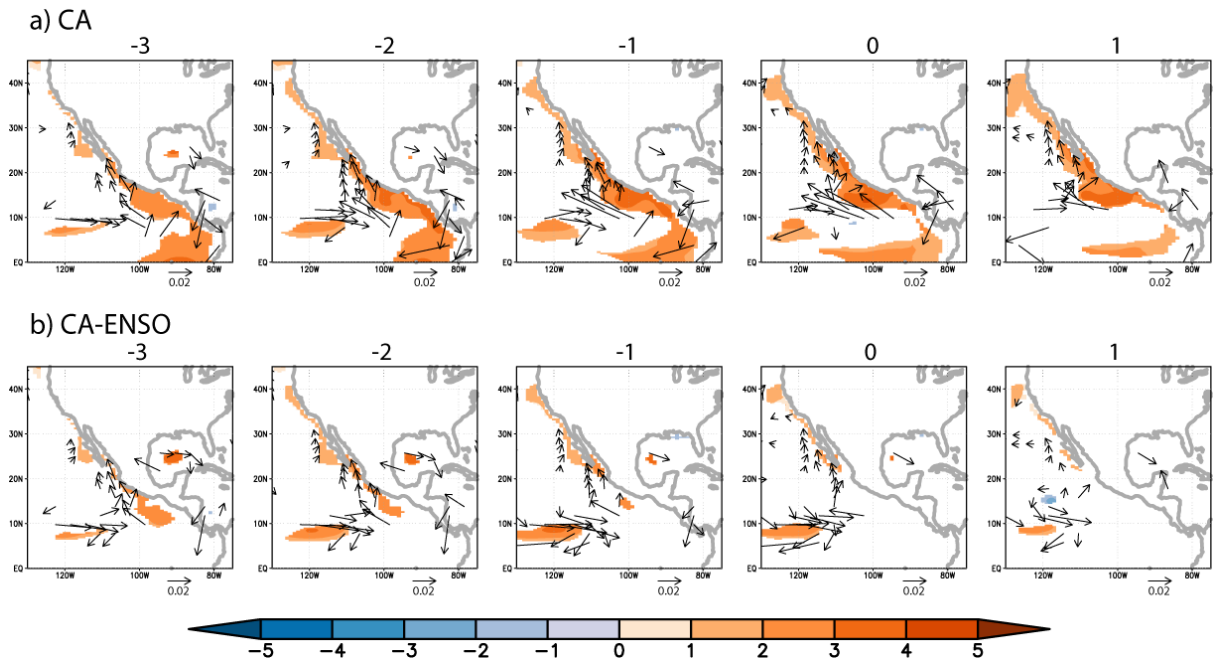

69

70 **Supplementary Figure 5:** Lead-lag linear regression of 3-month-running mean anomalies in  
 71 sea surface height (shading, mm) and horizontal current at 5 meter depth (vector,  $\text{m s}^{-1}$ ) based  
 72 on the JAS California Niño/Niña indices. Negative (positive) numbers on the top of panels  
 73 denote the months that JAS California Niño/Niña indices lag (lead). (b) as in (a) except that  
 74 the regression is computed based on the JAS California Niño/Niña indices after linearly  
 75 regressing out the simultaneous variations related to ENSO. Anomalies significant at the 95%  
 76 confidence level by the two-tailed  $t$  test are shown only. The figure was plotted by GrADS  
 77 software.

78

79

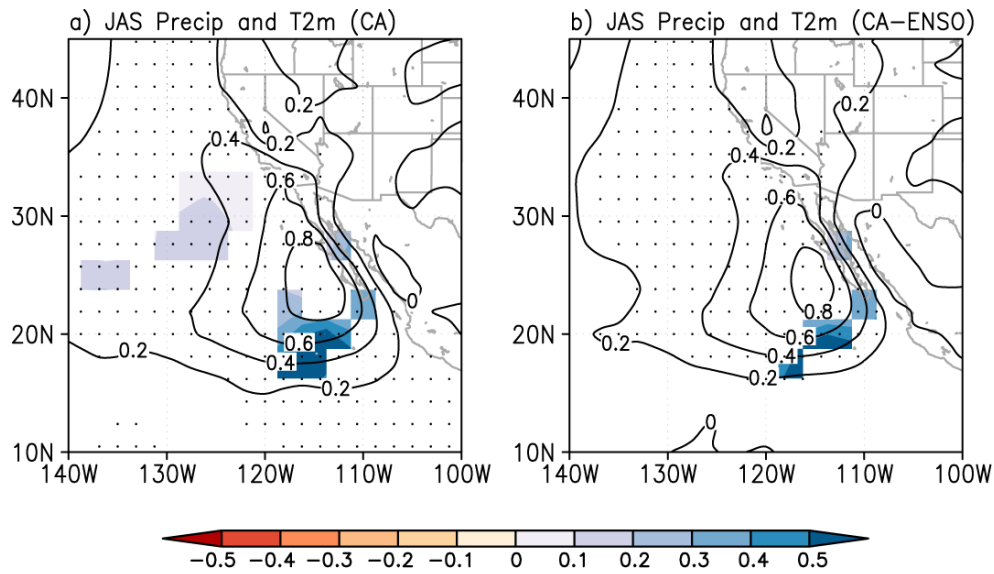

80

81 **Supplementary Figure 6:** (a) Linear regression of anomalies in the JAS precipitation  
 82 (shading,  $\text{mm day}^{-1}$ ) and 2-meter-high temperature (contour,  $^{\circ}\text{C}$ ) based on the JAS California  
 83 Niño/Niña indices. (b) as in (a) except that the regression is computed based on the JAS  
 84 California Niño/Niña indices after linearly regressing out the simultaneous variations related  
 85 to ENSO. Precipitation (temperature) anomalies significant at the 95% confidence level by  
 86 the two-tailed  $t$  test are shown only (stippled). The figure was plotted by GrADS software.

87

88



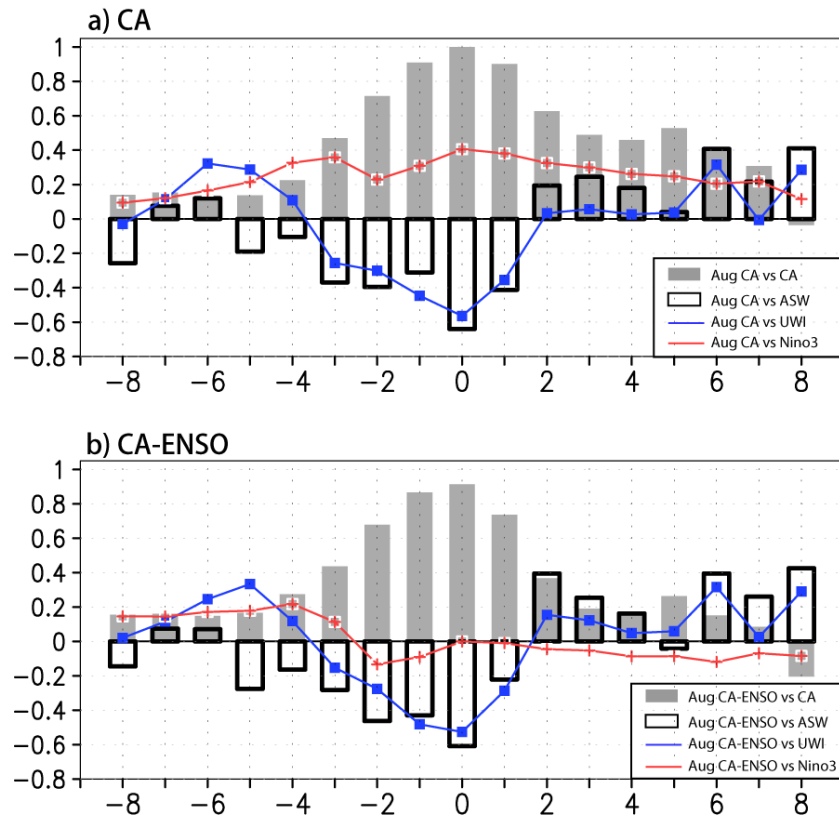

89  
 90  
 91  
 92  
 93  
 94  
 95  
 96  
 97  
 98  
 99

**Supplementary Figure 7:** a) Lead-lag correlation coefficients between the August California Niño/Niña indices (Aug CA) and the monthly California Niño/Niña (CA, grey filled bar), along-shore surface wind (ASW, dark open bar), upwelling (UMI, blue line) and Niño3 (red line) indices. ASW is positive equatorward. Negative (positive) numbers in the x-axis denote the months that the Aug CA lag (lead). (b) as in (a) except that the correlation coefficients are calculated by the Aug CA after linearly regressing out the simultaneous variations related to ENSO (Aug CA-ENSO). Correlation coefficients of  $\sim 0.4$  are significant at the 95% confidence level by the two-tailed  $t$  test. The figure was plotted by GrADs software.

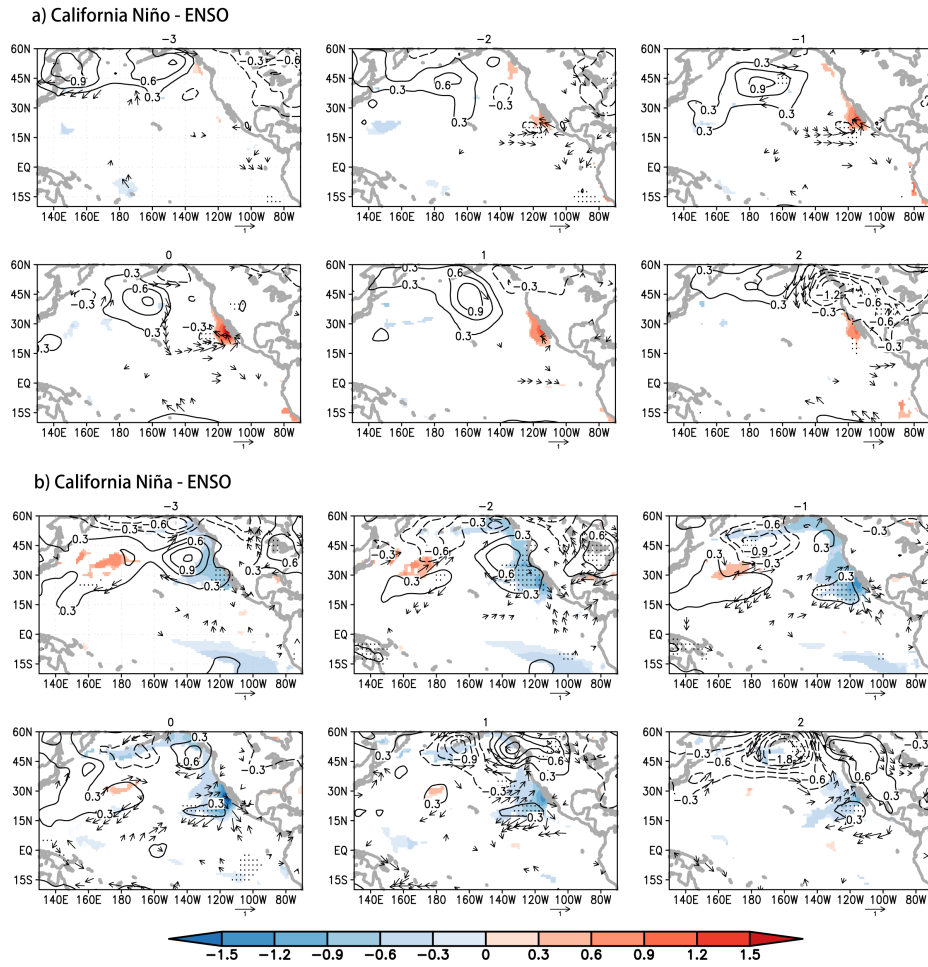

100

101 **Supplementary Figure 8:** Composites of 3-month-running mean anomalies in SST (shading,  
 102 °C), SLP (contour, hPa) and 10-meter-height wind (vector,  $1 \text{ m s}^{-1}$ ) for (a) California Niño  
 103 and (b) California Niña based on the residual anomalies after linearly removing the  
 104 ENSO-related simultaneous variations in each anomalous field. Negative (positive) numbers  
 105 in the top of each panel denote the months that the JAS California Niño/Niña lag (lead). The  
 106 anomalies in SST and wind (SLP) significant at the 95% confidence level by the two-tailed  $t$   
 107 test are shown only (stippled). The event years are selected if the JAS California Niño/Niña  
 108 indices after linearly removing the ENSO-related simultaneous variations are above/below  
 109  $0.5^\circ\text{C}$  ( $-0.5^\circ\text{C}$ ). There are eight (seven) California Niño (Niña) years, including 1983, 1984,  
 110 1985, 1990, 1992, 1997, 1998 and 2006 (1982, 1987, 1991, 1999, 2002, 2010 and 2011). The  
 111 figure was plotted by GrADS software.

112

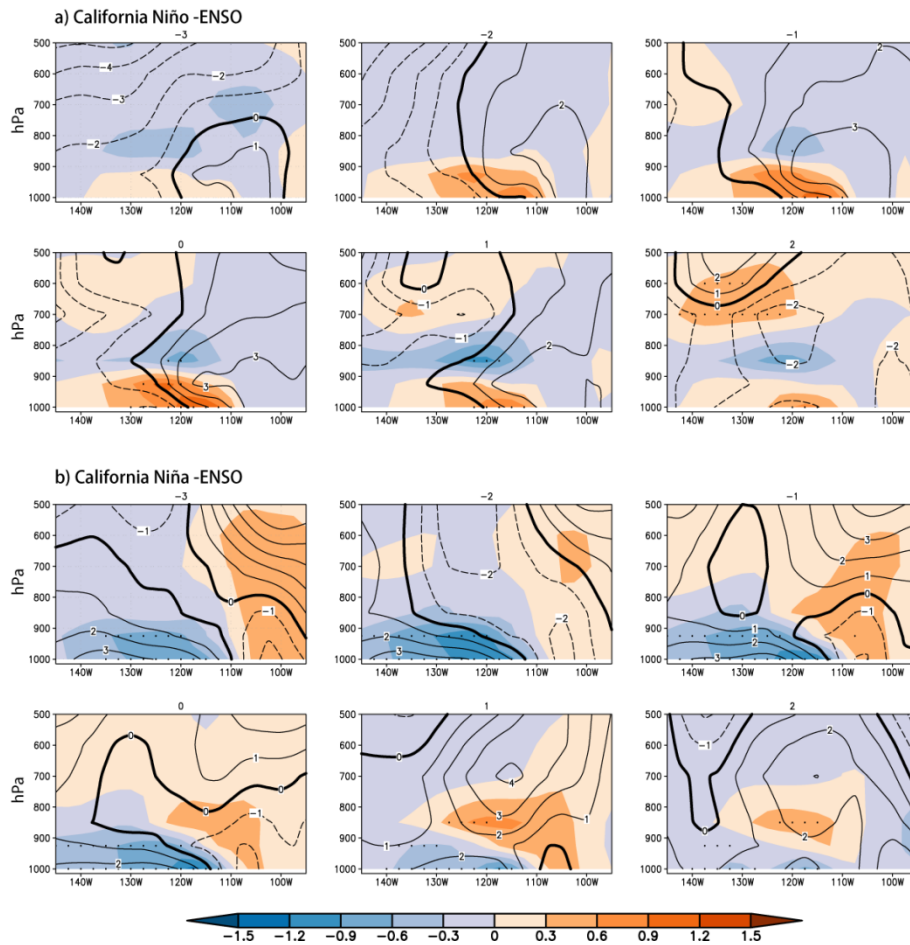

113

114 **Supplementary Figure 9:** As in Supplementary Fig. 8, but for the vertical-zonal section of  
115 geopotential height (contour, hPa) and air temperature (shading, °C) at 25°N. Air temperature  
116 anomalies significant at the 95% confidence level by the two-tailed  $t$  test are stippled. The  
117 figure was plotted by GrADs software.

118

119

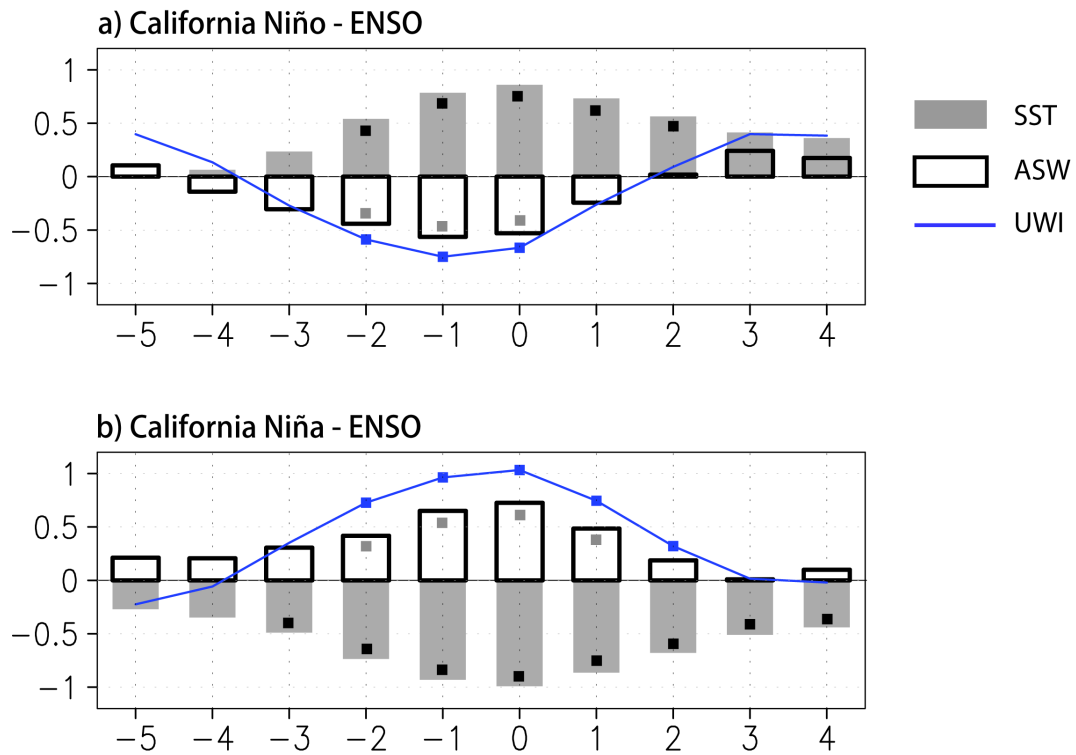

120

121 **Supplementary Figure 10:** As in Supplementary Fig. 8, but for California Niño/Niña indices

122 (grey filled bar, °C), ASW (dark open bar, m s<sup>-1</sup>) and UWI (blue line, m<sup>3</sup> s<sup>-1</sup> per 100 meters of

123 coastline). The ASW (UWI) has been multiplied by 2 (divided by 20). Anomalies significant

124 at the 95% confidence level by the two-tailed *t* test are marked by the filled squares. The

125 figure was plotted by GrADs software.

126
